# Supplementary material for: Baseline Striatal Functional Connectivity as a Predictor of Response to Antipsychotic Drug Treatment
Source: Atypon-hosted journal article supplement (doi:10.1176/appi.ajp.2015.14121571), 2015-08-28
Supplement: appi.ajp.2015.14121571.ds001.pdf [file appi.ajp.2015.14121571.ds001.pdf]

 


Psychiatry Online
